# Supplementary material
Source: PubMed Central journal article supplement (PMC6457467)
Supplement: NIHMS990888-supplement-1.pdf [file NIHMS990888-supplement-1.pdf]

# ADVANCED BIOSYSTEMS

## Supporting Information

for *Adv. Biosys.*, DOI: 10.1002/adbi.201800210

Modular Antigen-Specific T-cell Biofactories for Calibrated In Vivo Synthesis of Engineered Proteins

*Claire E. Repellin, Puja Patel, Lucia Beviglia, Harold Javitz, Lidia Sambucetti, and Parijat Bhatnagar\**

Copyright WILEY-VCH Verlag GmbH & Co. KGaA, 69469 Weinheim, Germany, 2018.

## Supporting Information

### Modular Antigen-specific T-cell Biofactories for Calibrated *in vivo* Synthesis of Engineered Proteins

Claire E. Repellin, Puja Patel, Lucia Beviglia, Harold Javitz, Lidia Sambucetti, Parijat Bhatnagar\*

**Experimental designs and statistical analysis.** The experimental design for **Figures S1-S3** is described. GraphPad Prism 6 (GraphPad Software, Inc) was used to conduct all statistical analysis.

**i) Figure S1 (Design and selection of the Actuator).** The Jurkat Clone E6-1 suspension cell line was engineered with the lentivirus particles carrying three variations of the *T-cell Biofactory* insert (per **Fig. 1B** but without the *Secretor* domain and without the *Sensor-Receptor* domain). Each variation consisted of the *Effector* transgene regulated with a different version of the *Actuator* (three, six, and nine copies of NFAT-RE as per **Fig. S1(i)**). The Nluc activity for three *T-cell Biofactories* chemically stimulated (1  $\mu$ M ionomycin, 30 nM phorbol 12-myristate 13-acetate (PMA) for 24 hrs) for  $[Ca^{2+}]_i$  rise was fit using  $Y = a + b * \log(X)$  where  $X$  is the number of *T-cell Biofactories* (**Fig. S1(ii)**) and  $Y = a + b * X + c * X^2$ , where  $X$  is the stimulation time in hrs (**Fig. S1(iii)**). The signal-to-noise ratio (S/N) for each *T-cell Biofactory* was determined by calculating the ratio of means of Nluc activity from the chemically activated *T-cell Biofactory* to that of its non-activated counterpart (**Fig. S1(ii)**). The error bars are one standard deviation (SD) above and below the mean and can also be considered as one half-width of an 86% confidence interval for that mean. The upregulation in Nluc activity was observed for at least 10 days. (**Fig. S1(iii)**). Although higher Nluc activity was observed from the *T-cell Biofactories* engineered with NFAT-RE9X, the NFAT-RE6X

*Actuator* was preferred due to its reduced potential to non-specifically activate and was selected for use in generating the *T-cell Biofactory* as shown in **Fig. 1A**.

**ii) Figure S2 (Design and selection of the *Sensor-Receptor*).** The Jurkat Clone E6-1 suspension cell line pre-engineered with  $\text{NFAT-RE6X}_{\rightarrow}$ Nluc-2A-GFP was further engineered with lentivirus particles for three different variations of *Sensor-Receptor* under a neomycin resistance marker translated by aminoglycoside 3'-phosphotransferase transgene. Each variation consisted of a different version of the constitutively expressed *Sensor-Receptor* (as per **Fig. S2(i)**) for targeting FRa on the antigen-presenting cell. The three *T-cell Biofactories* (per **Fig. 1B** but without the *Secretor* domain) and a control (per **Fig. 1B** but without the *Secretor* domain and without the *Sensor-Receptor* domain) were biologically stimulated (using the three A2780cis variant cell lines engineered for FRa or MSLN expression for 24 hrs). The S/N for each *T-cell Biofactory* was determined by calculating the ratio of means of Nluc activity from the *T-cell Biofactory* stimulated by the antigen-positive cells ( $\text{FRa}^+\text{MSLN}^{\text{neg}}$  A2780cis or  $\text{FRa}^{\text{neg}}\text{MSLN}^+$  A2780cis) to that stimulated by the  $\text{FRa}^{\text{neg}}\text{MSLN}^{\text{neg}}$  A2780cis cells (**Fig. S2(ii)**). The error bars extend 1 SD above the mean and can also be considered as one half-width of an 86% confidence interval for that mean. Based on these data, the FRa-CAR3 *Sensor-Receptor* was selected for use in generating the *T-cell Biofactory* as shown in **Fig. 1A**.

Compared to FRa-CAR2, the intracellular portion of the FRa-CAR3 contains the additional 4-1BB co-stimulatory domain found to enhance the therapeutic response of CAR T cells by mitigating early exhaustion of T cells engineered to express antigen-specific CARs. Other intracellular domains include the intracellular portion of CD28 and CD3-zeta. The extracellular portion of FRa-CAR *Sensor-Receptor* comprises the CD8 segment proximal to the cell membrane as a hinge to facilitate the formation of immune synapse; and the FRa-specific *Sensor* at the distal end with variable domains from heavy ( $V_H$ ) and light ( $V_L$ ) chain

of the anti-FRa antibody (MORAb-003) is optimized for human expression. The *Sensor* portion determines the specificity for antigen-presenting cells. The FRa-CAR2 (with 5'-V<sub>H</sub>-V<sub>L</sub>-3') and FRa-CAR1 (with 5'-V<sub>L</sub>-V<sub>H</sub>-3') were compared to determine the favorable positions of V<sub>H</sub> and V<sub>L</sub> relative to each other. Based on this comparison, the 5'-V<sub>H</sub>-V<sub>L</sub>-3' orientation was identified as the preferred orientation for the *Sensor* design. The transmembrane portion that connects the extracellular and intracellular portions is from the CD28 and extends as the intracellular co-stimulatory domain.

**iii) Figure S3 (Selection of an efficient *Secretor*).** Plasmid with optimally configured *Actuator* and FRa-specific *Sensor-Receptor* sequences (FRa-CAR3<sub>NFAT-RE6X</sub>→Nluc-2A-GFP) was modified in five different ways with different signal peptides as *Secretor* for the *Effector*. The signal peptides used were from human serum albumin (HSA), interleukin (IL)-6, IL-2, Gaussia luciferase (Gluc) or interferon (IFN) alpha-2, as per **Fig. S3(i)**. The Jurkat Clone E6-1 suspension cell line was engineered with the lentivirus particles prepared from these plasmids. The five *T-cell Biofactories* (per **Fig. 1B**) and a control (per **Fig. 1B** but without any *Secretor*) were biologically stimulated (using the parental OVCAR3 (FRa<sup>+</sup>) cells or A2780cis (FRa<sup>neg</sup>) cells) for 6 hrs (See *Methods Section* “Signal Peptide Experiment and Co-culture” for the complete procedure). The S/N for each *T-cell Biofactory* was determined by calculating the ratio of means of Nluc activity from the *T-cell Biofactory* stimulated by parental OVCAR3 (FRa<sup>+</sup>) cells to that from stimulated by parental A2780cis (FRa<sup>neg</sup>) cells (**Fig. S3(ii)**). The error bars extend 1 SD above the mean and can also be considered as one half-width of an 86% confidence interval for that mean. Based on these data, IFNa2 was selected as the *Secretor* for use in generating the *T-cell Biofactory* as shown in **Fig. 1A**.

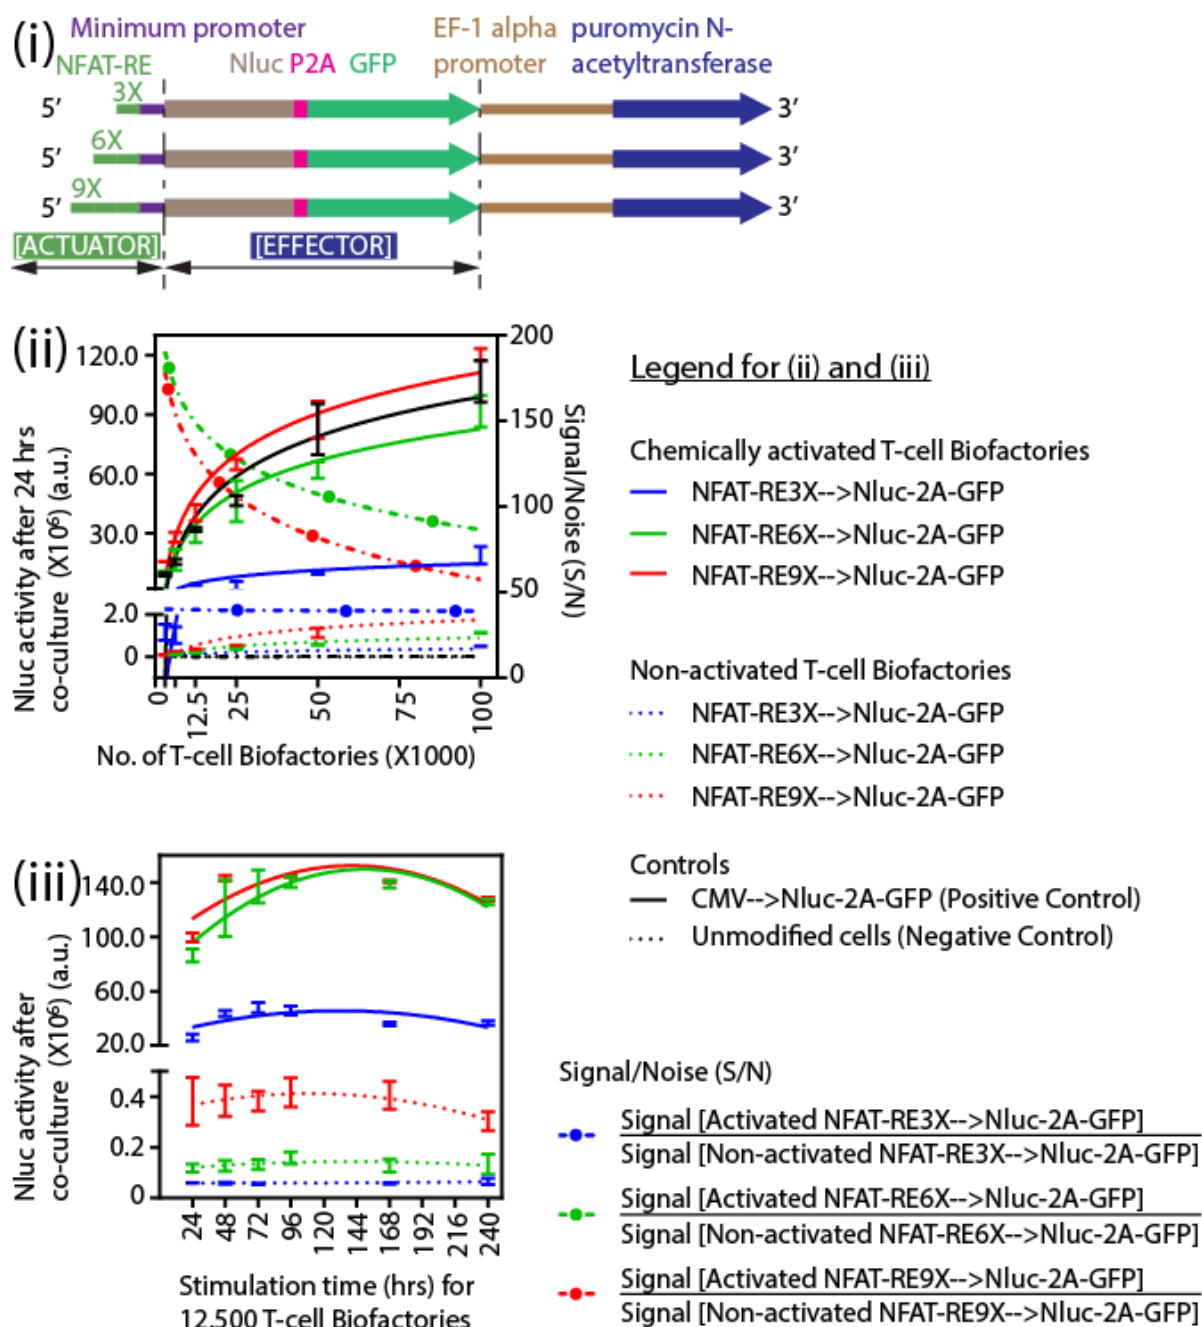

**Figure S1. Design and selection of the Actuator.** (i) Schematic for the *T-cell Biofactories* insert encoding different variations of the *Actuator*. The Nluc activity for activated and non-activated forms of three differently engineered *T-cell Biofactories* [per **Fig. S1(i)** (NFAT-RE3X; NFAT-RE6X; NFAT-RE9X); and one control with CMV regulated reporters] was measured w.r.t. the (ii) number of T-cell Biofactories, (iii) stimulation time. [n=3 for (ii); n=4 for (iii), error bar indicates  $\pm 1$  SD].

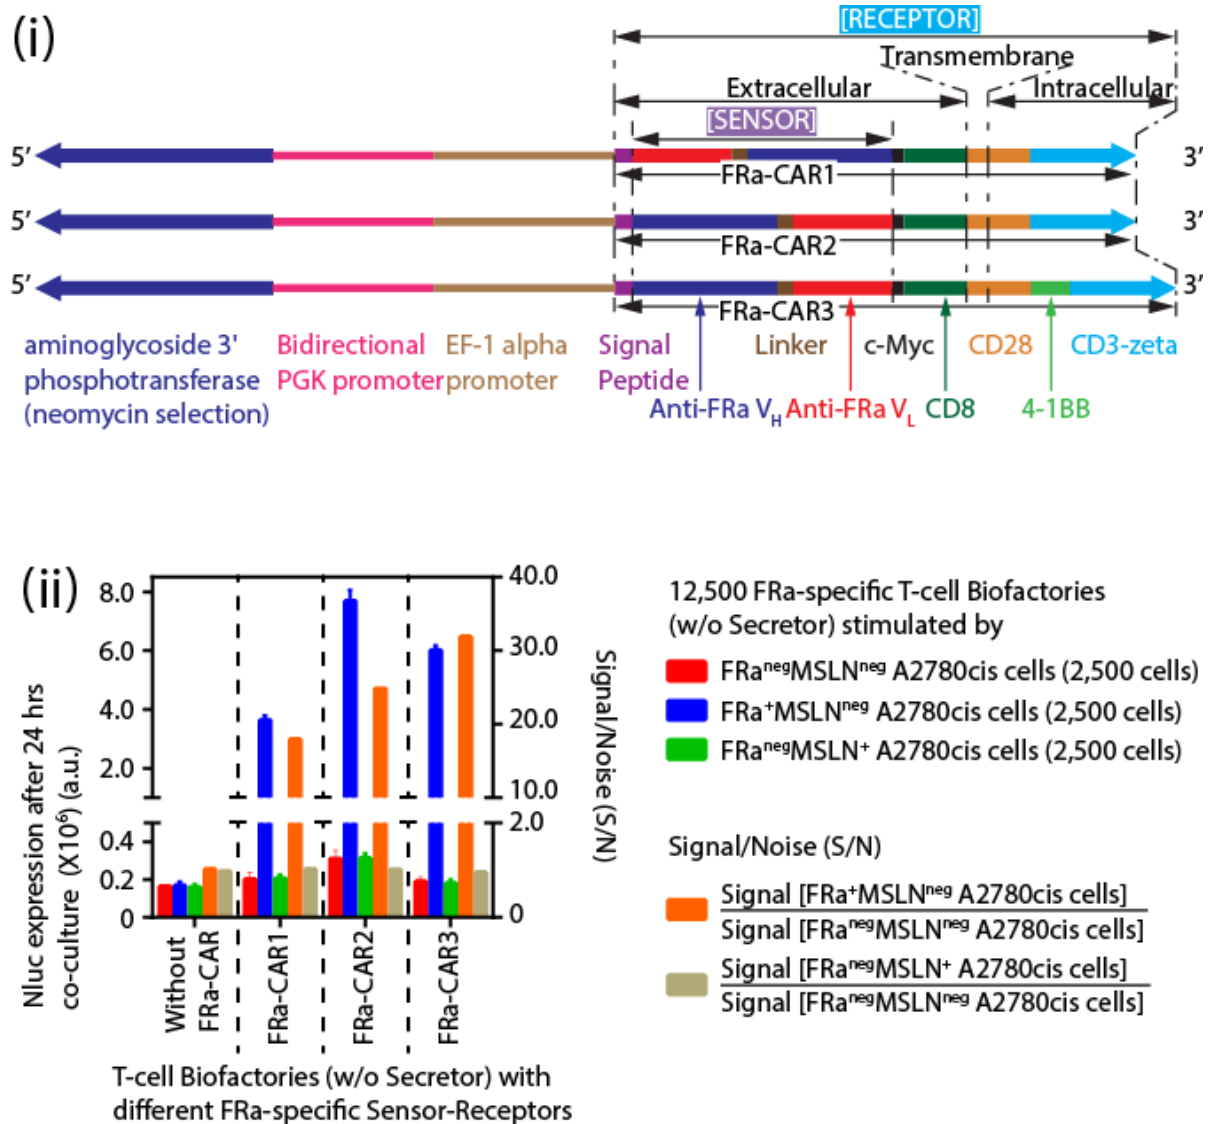

**Figure S2. Design and selection of the Sensor-Receptor.** (i) Schematic for the *T-cell Biofactories* insert encoding different variations of the *Sensor-Receptor*. (ii) The Nluc activity ( $n=4$ , error bar indicates  $\pm 1$  SD) for activated and non-activated forms of four differently engineered *T-cell Biofactories* [per **Fig. S2(i)** (FRa-CAR1; FRa-CAR2; FRa-CAR3); and one control without the FRa-CAR *Sensor-Receptor* domain] when stimulated by three different target/non-target cells (FRa<sup>neg</sup>MSLN<sup>neg</sup> A2780cis; FRa<sup>+</sup>MSLN<sup>neg</sup> A2780cis; FRa<sup>neg</sup>MSLN<sup>+</sup> A2780cis).

(i)

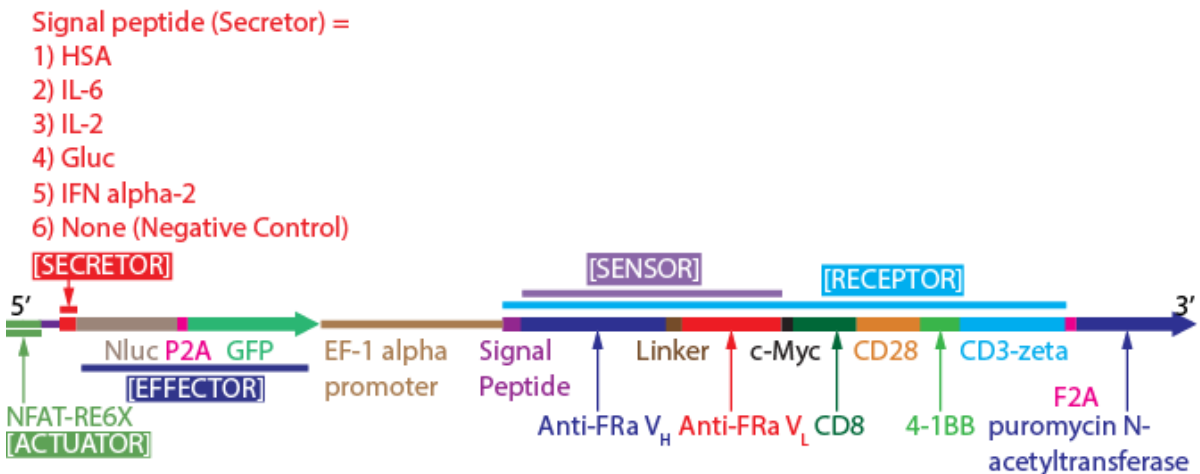

(ii)

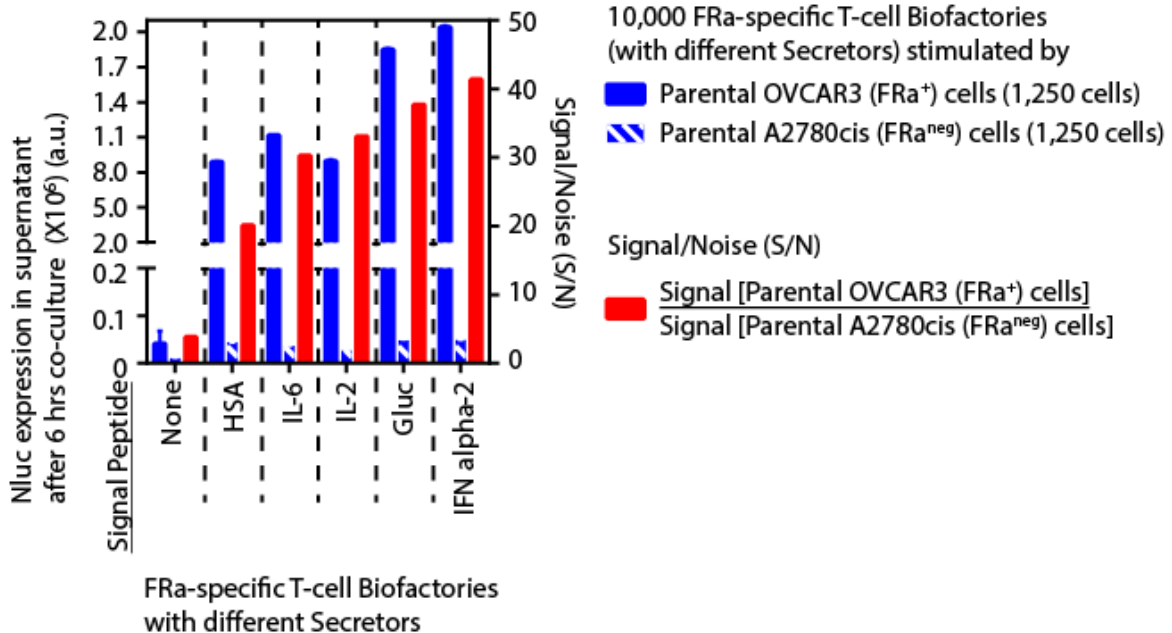

**Figure S3. Selection of an efficient Secretor.** (i) Schematic for the *T-cell Biofactories* insert with different variations of the *Secretor*. (ii) The Nluc activity (n=4, error bar indicates  $\pm 1$  SD) for activated and non-activated forms of six differently engineered *T-cell Biofactories* [per **Fig. S3(i)** (five with signal peptides from HSA, IL-6, IL-2, Gluc, IFN alpha-2); and one control without any signal peptide *Secretor* domain] when stimulated by two different target/non-target cells (parental OVCAR3 (FRa<sup>+</sup>) cells A2780cis (FRa<sup>neg</sup>) cells).

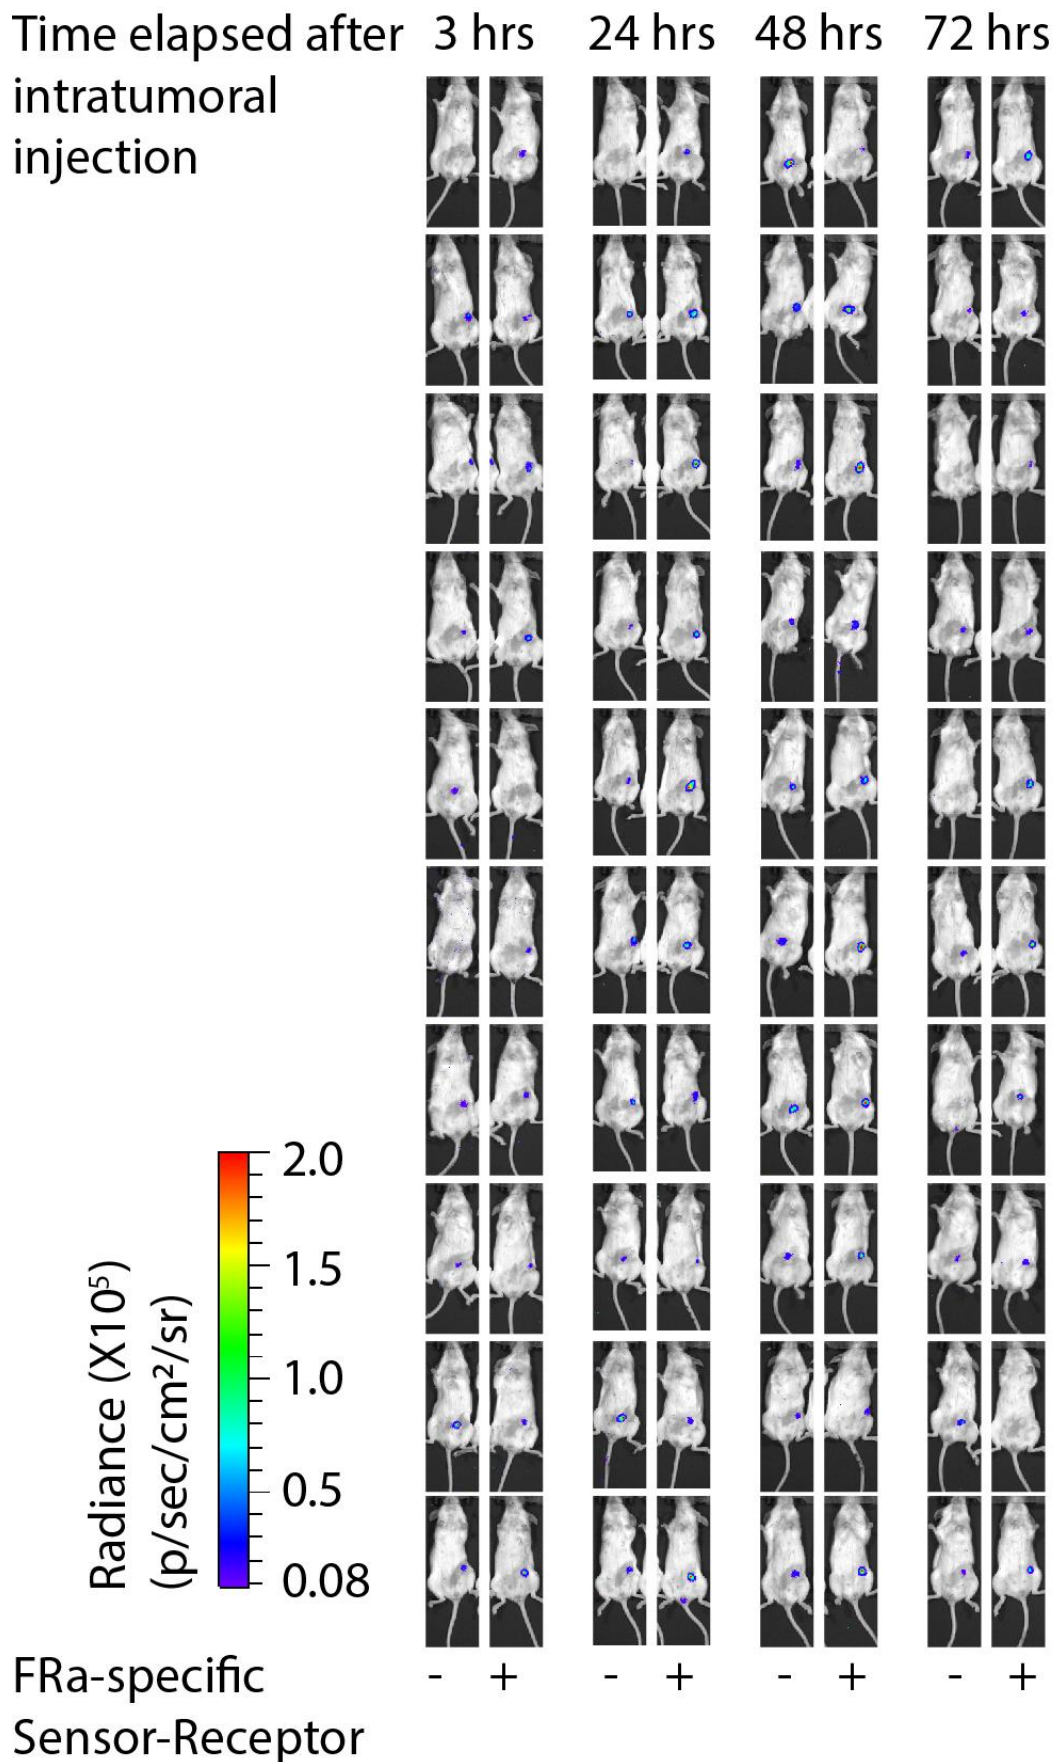

**Figure S4. *In vivo* validation (all mice) of the T-cell Biofactory.** Data for the longitudinal bioluminescent imaging of all mice (n=10) at the indicated time points. (See *Experimental Methods* Section “*In vivo* study/ Bioluminescent imaging” for the complete procedure).
